# Supplementary material
Source: MDPI journal article supplement (https://www.mdpi.com/2305-7084/5/3/41)
Supplement: s1 [file s1]

# Supplementary Information

## MoS<sub>2</sub>-Cysteine nanofiltration membrane for lead removal

Jaewon Jang <sup>1,\*</sup>, Sang-Soo Chee <sup>2,\*</sup>, Yesol Kang <sup>1</sup>, and Suhun Kim <sup>1</sup>

<sup>1</sup> School of Earth Sciences and Environmental Engineering, Gwangju Institute of Science and Technology (GIST), Gwangju 61005, Korea.; jwjang@gm.gist.ac.kr (J.J.); yesol7964@gist.ac.kr (Y.K.); tngjs2020@gm.gist.ac.kr (S.K.)

<sup>2</sup> Nanomaterials and Nanotechnology Center, Korea Institute of Ceramic Engineering and Technology (KICET), Jinju-si 52851, Korea.; sschee@kicet.re.kr (S.S.C.)

\* Correspondence: jwjang@gm.gist.ac.kr; Tel.: +82-62-715-2714 (J.J.); sschee@kicet.re.kr, Tel: +82-55-792-2684 (S.S.C.)

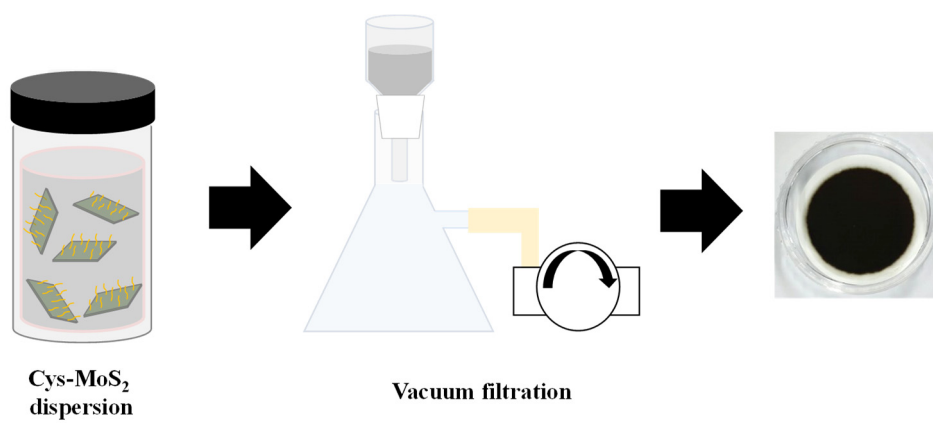

**Figure S1.** A fabrication process of Cys-MoS<sub>2</sub> NF membranes.

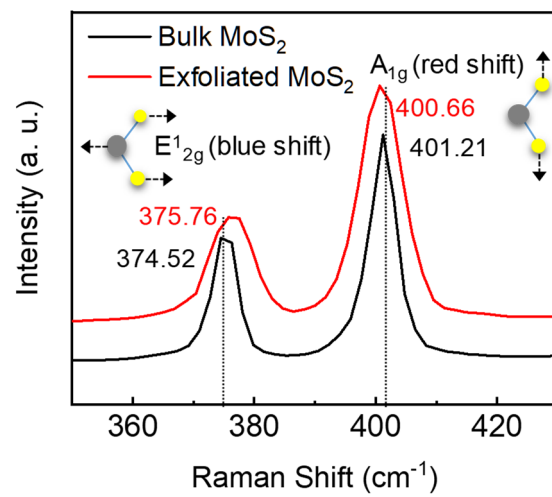

**Figure S2.** Raman spectra of the bulk MoS<sub>2</sub> and exfoliated MoS<sub>2</sub> nanosheet.

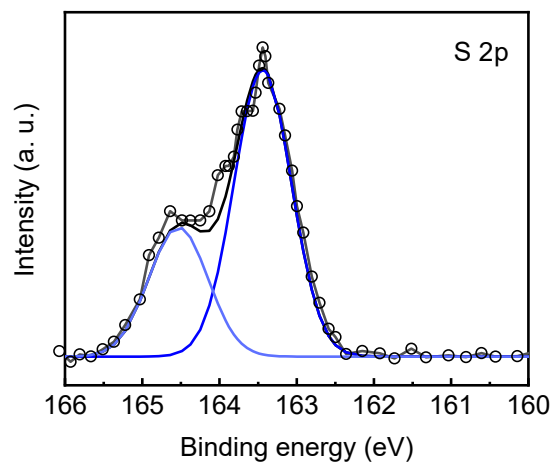

**Figure S3.** S 2p XPS core-level spectra of the Cysteine.

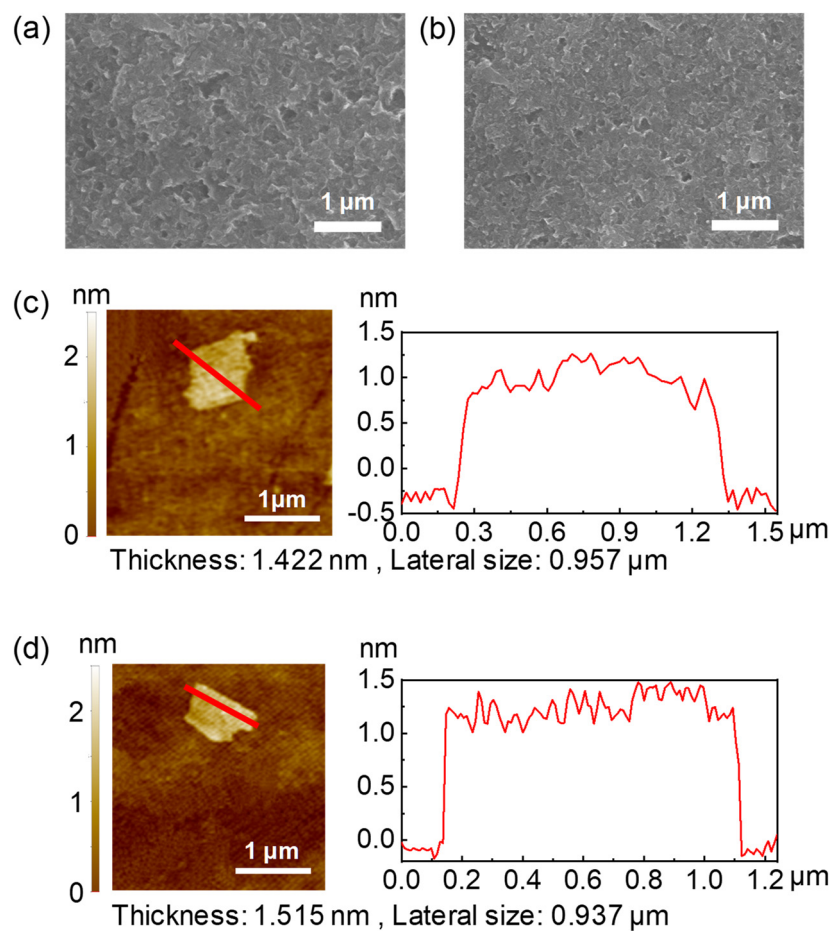

**Figure S4.** SEM images of (a) pristine MoS<sub>2</sub> and (b) MoS<sub>2</sub>-Cys membranes. AFM results of (c) pristine MoS<sub>2</sub> and (d) MoS<sub>2</sub>-Cys membranes.

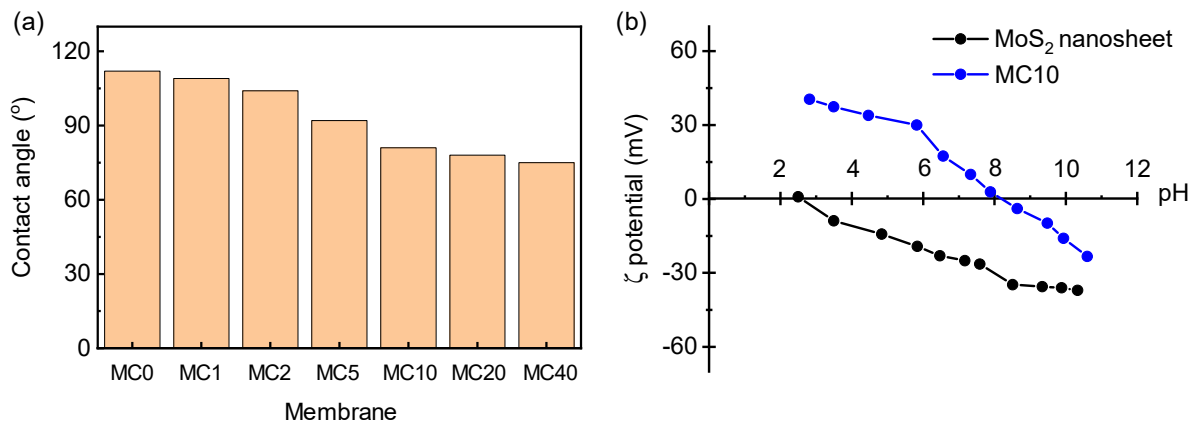

**Figure S5.** (a) Water contact angle according to Cysteine concentration and (b) Zeta potential of the MoS<sub>2</sub> nanosheet and MC10 in various pH.

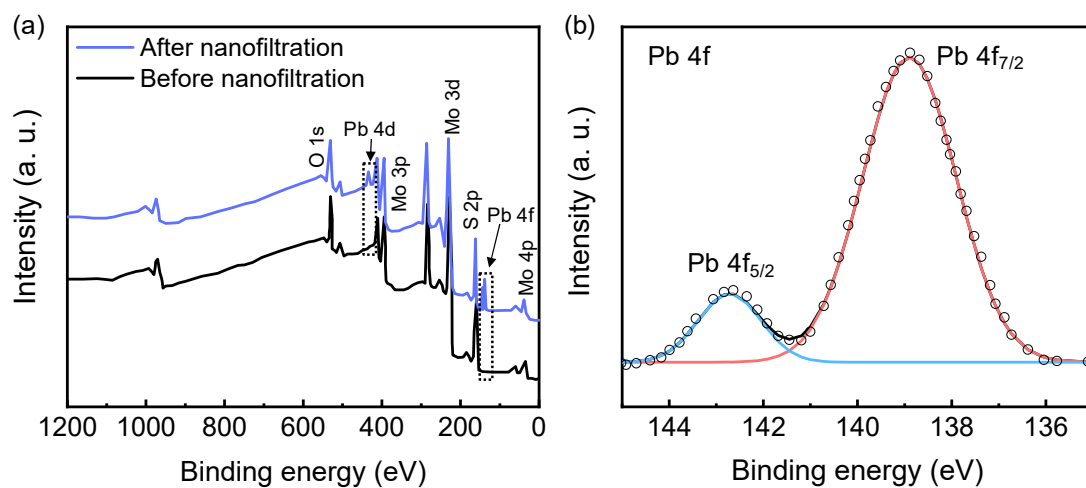

**Figure S6.** (a) XPS survey spectra before/after nanofiltration and (b) Pb 4f core-level after nanofiltration of the MoS<sub>2</sub>-Cys membrane.
